# Supplementary material for: Construction of pH sensitive smart glutathione peroxidase (GPx) mimics based on pH responsive pseudorotaxanes
Source: Royal Society of Chemistry journal article supplement (doi:10.1039/d0ob00122h), 2020-01-01
Supplement: d0ob00122h1.pdf [file d0ob00122h1.pdf]

# Supporting Information

## **Construction of pH sensitive smart glutathione peroxidase (GPx) mimic based on pH responsive pseudorotaxane**

*Jiayi Li, Wenlong Jia, Ganghui Ma, Xiaoyin Zhang, Shaojie An, Tao Wang and  
Shan Shi\**

College of Materials Science and Engineering, Shenyang University of  
Chemical Technology, Shenyang 110142, People's Republic of China

\*Email: [sshi@syuct.edu.cn](mailto:sshi@syuct.edu.cn)

## **Contents**

|                                                                                                                                     |           |
|-------------------------------------------------------------------------------------------------------------------------------------|-----------|
| <b>1. Characterization of compound 1-10.....</b>                                                                                    | <b>3</b>  |
| <b>2. Binding constant calculation of compound 1 and 2 with<br/>CB[6] .....</b>                                                     | <b>13</b> |
| <b>3. Catalytic curves of compound 1 in enzymatic kinetics tests<br/>.....</b>                                                      | <b>15</b> |
| <b>4. Catalytic curves of compound 2 in enzymatic kinetics tests<br/>.....</b>                                                      | <b>18</b> |
| <b>5. Double-reciprocal plots of the reduction of H<sub>2</sub>O<sub>2</sub> by GSH<br/>under the catalysis of compound 1 .....</b> | <b>21</b> |
| <b>6. Double-reciprocal plots of the reduction of H<sub>2</sub>O<sub>2</sub> by GSH<br/>under the catalysis of compound 2 .....</b> | <b>22</b> |

# 1. Characterization of compound 1-10

## 1.1. Synthesis of compound 4

Compound **4** is not a new compound. The synthesis of compound **4** has been reported many times. Generally, the synthetic route of compound **4** was as follows. 2-bromoethylamine hydrobromide (**3**, 10.0g, 48.8mmol) was added to 100mL tetrahydrofuran in a 500mL round bottom flask. Triethylamine (20.0mL, 143.9mmol) added into the round bottom flask dropwise to neutralize hydrobromic acid. Di-tert-butyl dicarbonate (11.0 g, 50.4mmol) was dissolved in 100mL tetrahydrofuran and added into the round bottom flask dropwise under ice-bath for 2 hours. The solution was stirred for 12 hours at room temperature. The volatiles were removed under reduced pressure and transferred the residue to a 500mL separatory funnel using 200mL. The ethyl acetate solution was extracted by 0.1M hydrochloric acid (3\*100mL), 5% sodium bicarbonate solution (3\*100mL), saturated sodium chloride solution (3\*100mL) respectively. The organic phase was dried with anhydrous sodium sulfate and then volatiles were removed under reduced pressure to give a transparent liquid **4** (10.1 g, 92% yield).  $\delta_H$  (500 MHz;  $CDCl_3$ ;  $Me_4Si$ ) 1.45 (9H, s,  $C(Me)_3$ ) 3.46 (2H, t,  $J=5.5$  Hz,  $NCH_2$ ) 3.53 (2H, t,  $J=5.0$  Hz,  $BrCH_2$ ) 4.93 (1H, s, NH) (Figure S1)

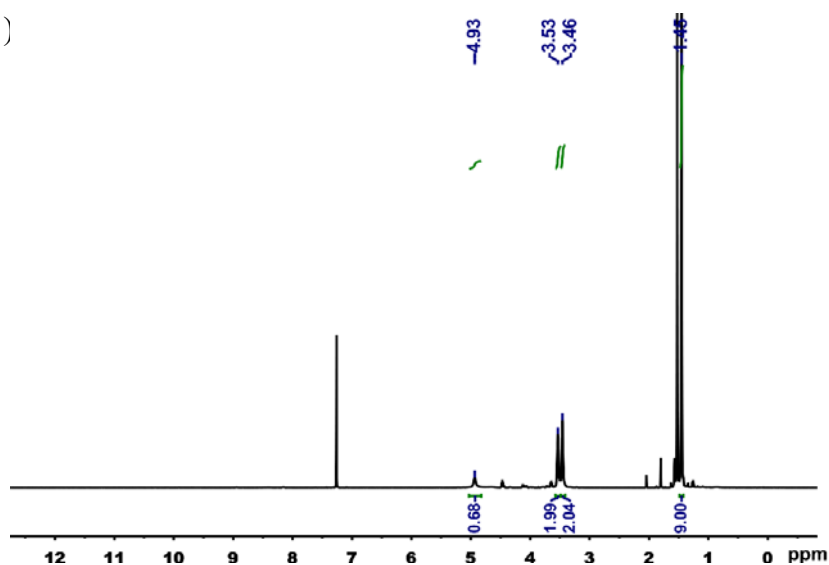

Figure S1.  $^1H$  NMR spectrum of compound **4**.

**1.2.  $^1\text{H}$  NMR,  $^{13}\text{C}$  NMR spectrum and high resolution ESI-TOF mass spectrum of compound 5**

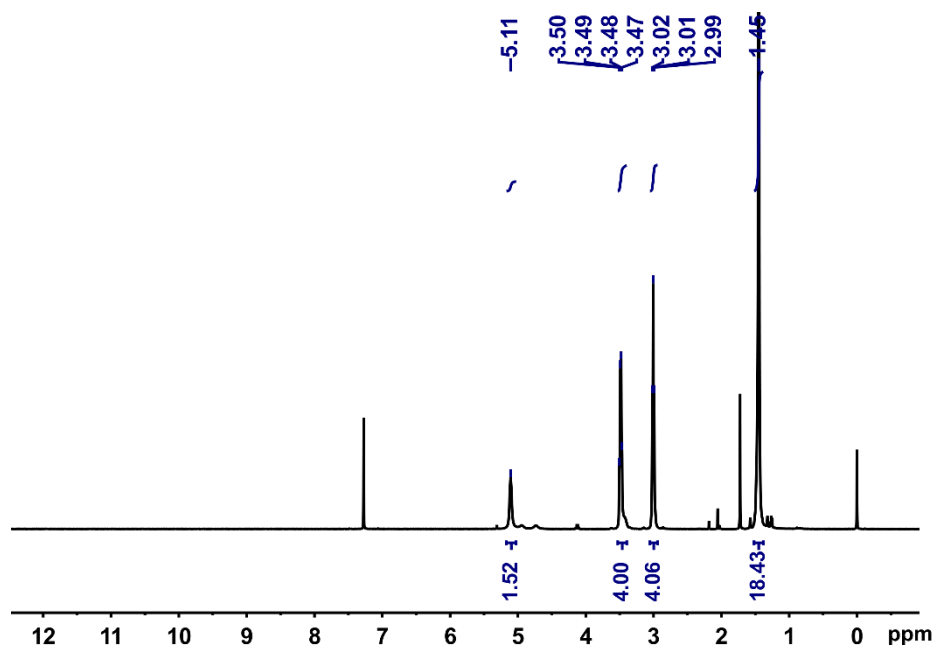

**Figure S2.**  $^1\text{H}$  NMR spectrum of compound 5.

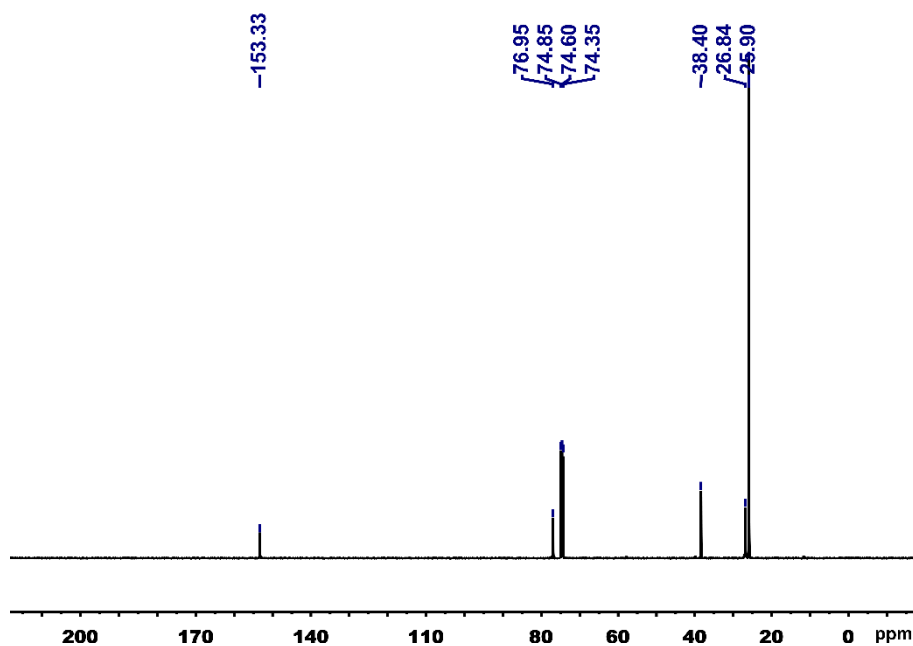

**Figure S3.** <sup>13</sup>C NMR spectrum of compound **5**.

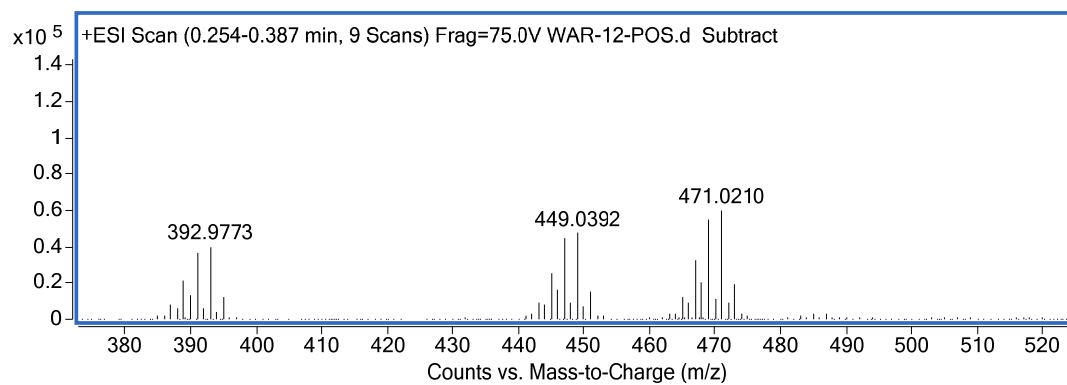

**Figure S4.** High resolution ESI-TOF mass spectrum of compound **5**.

**1.3  $^1\text{H}$  NMR,  $^{13}\text{C}$  NMR spectrum and high resolution ESI-TOF mass spectrum of compound 1**

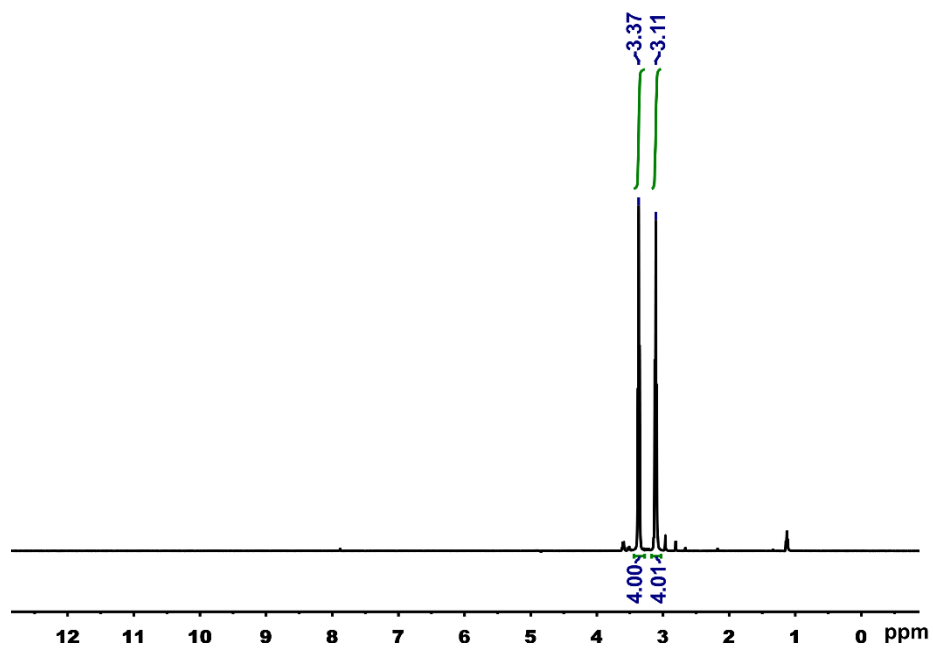

**Figure S5.**  $^1\text{H}$  NMR spectrum of compound 1.

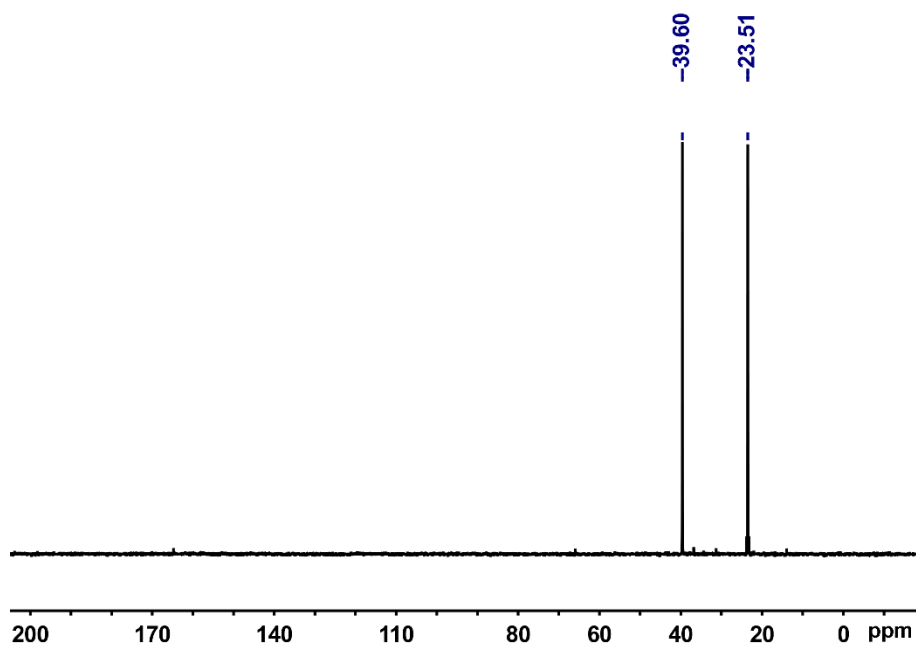

**Figure S6.**  $^{13}\text{C}$  NMR spectrum of compound **1**.

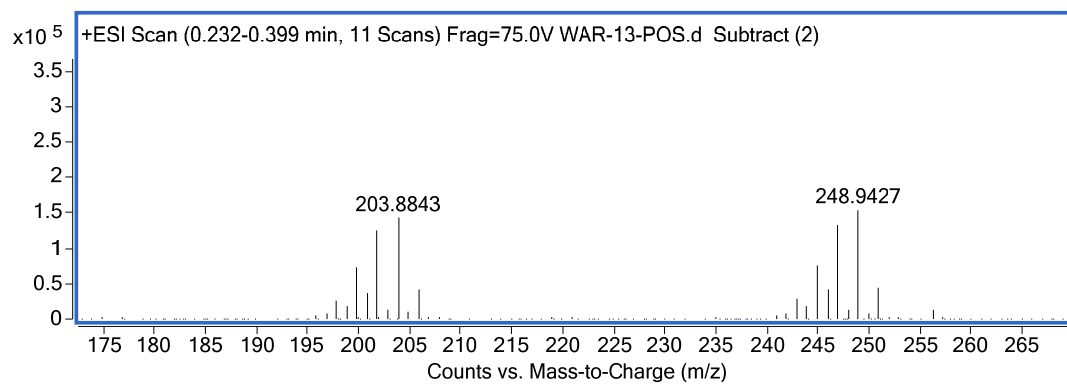

**Figure S7.** High resolution ESI-TOF mass spectrum of compound **1**.

**1.4  $^1\text{H}$  NMR,  $^{13}\text{C}$  NMR spectrum and high resolution ESI-TOF mass spectrum of compound 9**

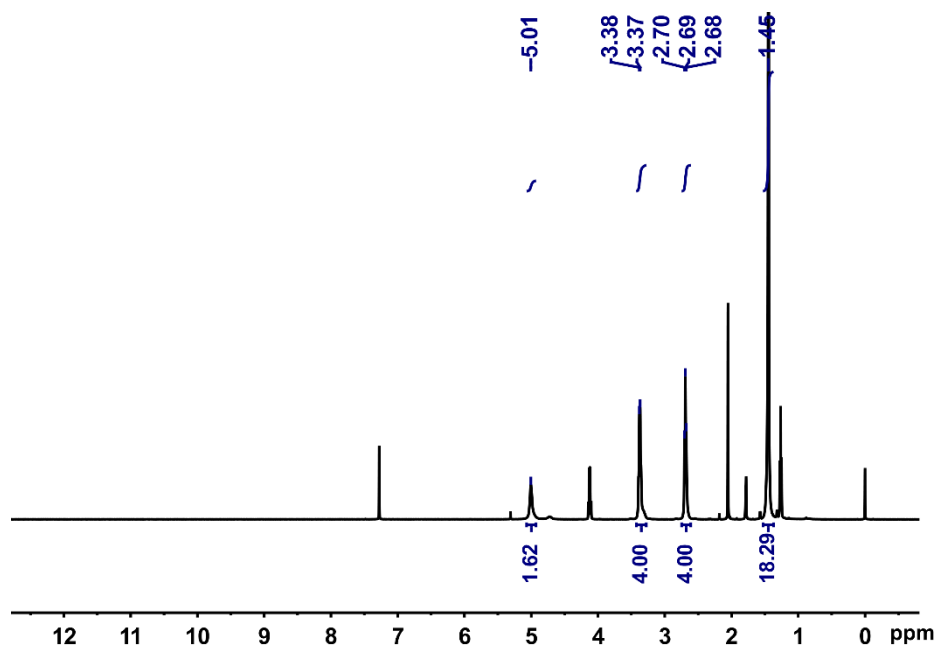

**Figure S8.**  $^1\text{H}$  NMR spectrum of compound 9.

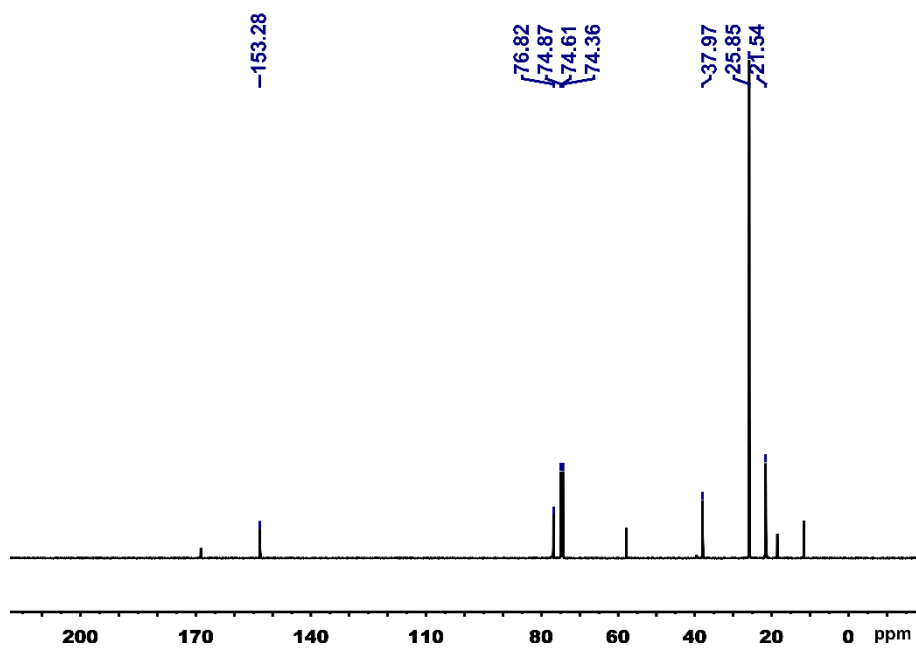

**Figure S9.** <sup>13</sup>C NMR spectrum of compound **9**.

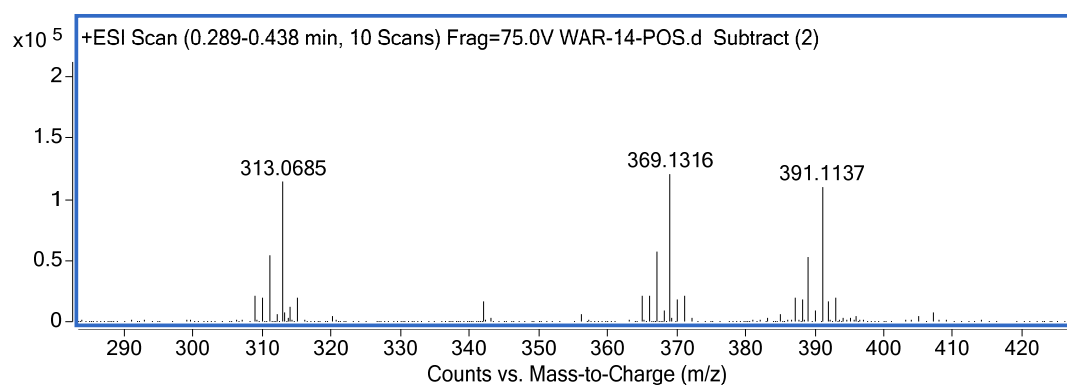

**Figure S10.** High resolution ESI-TOF mass spectrum of compound **9**.

**1.5  $^1\text{H}$  NMR,  $^{13}\text{C}$  NMR spectrum and high resolution ESI-TOF mass spectrum of compound 2**

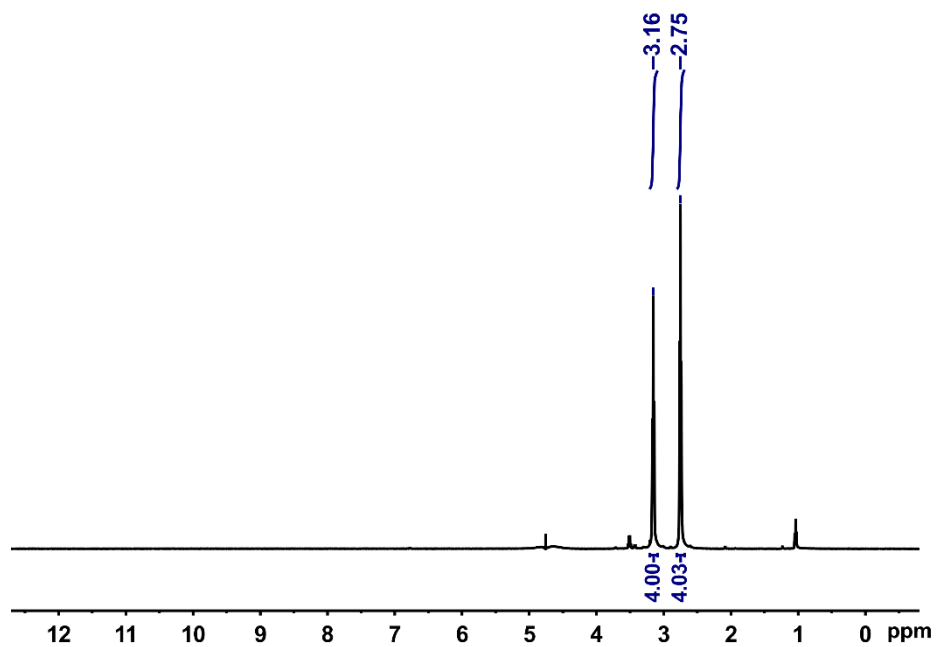

**Figure S11.**  $^1\text{H}$  NMR spectrum of compound 2.

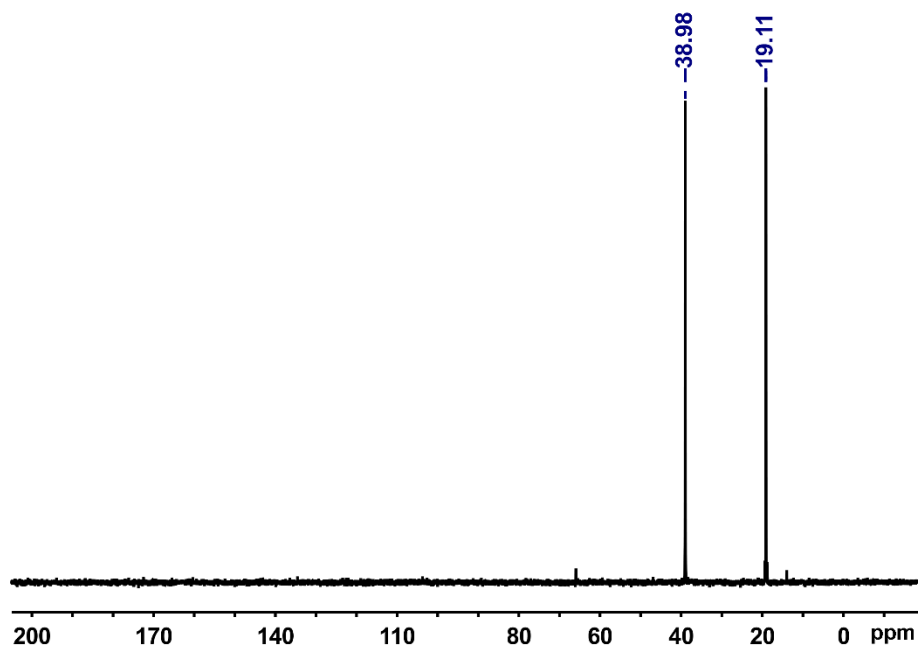

**Figure S12.**  $^{13}\text{C}$  NMR spectrum of compound **2**.

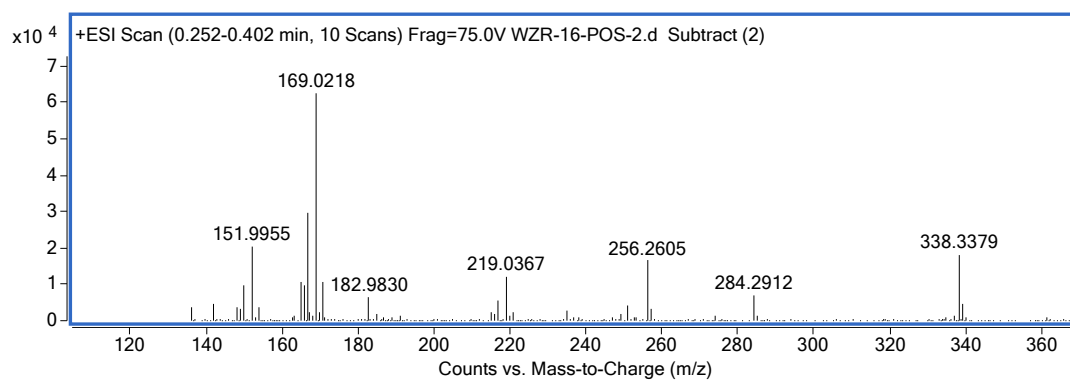

**Figure S13.** High resolution ESI-TOF mass spectrum of compound **2**.

## 1.6 Synthesis spectrum of CB[6]

CB[6] was synthesized according to the literature (K. Kim, *Chem. Soc. Rev.*, 2002, **31**, 96). Glycoluril (5.68g, 40mmol) was reacted with formaldehyde (37% w/w, 7.0ml) in 9M sulfuric acid (20ml) at 75°C for 24 h and then at 100°C for 12 h. After the reaction mixture was poured into water (200 mL), acetone (1.0 L) was added to produce precipitate. The precipitate was separated by decantation, washed with water/acetone (1:4), and filtered. 300mL water/acetone (1:2) was added to the resulting solid and stirred for a few minutes. The precipitate is the major product CB[6] that was separated by filtration and dried under vacuum.  $\delta_{\text{H}}$  (500 MHz; D<sub>2</sub>O, KCl) 4.32 (12H, d, J=15.5Hz, CH<sub>2</sub>) 5.59 (12H, s, CH) 5.67 (12H, d, J=15.5Hz, CH<sub>2</sub>) (Figure S14).

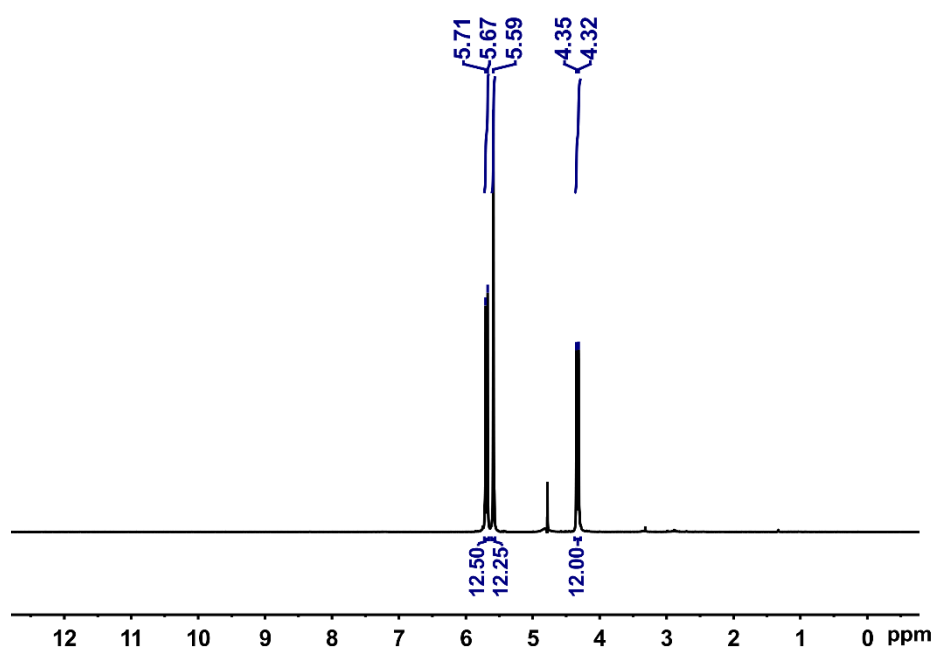

Figure S14. <sup>1</sup>H NMR spectrum of CB[6].

## 2. Binding constant calculation of compound **1** and **2** with CB[6]

### 2.1 Binding constant calculation of compound **1** with CB[6]

Generally, CB[6] and compound **1** was dissolved in D<sub>2</sub>O at the ratio of 1:1. The experiment was performed in triplicate. The binding constants were calculated according to the integral of peaks corresponding to CB[6], compound **1** and pseudorotaxane. The binding constants between CB[6] and compound **1** for the three experiments were calculated to be  $1.28 \times 10^4$ ,  $1.17 \times 10^4$  and  $1.11 \times 10^4 \text{ M}^{-1}$ , respectively. Thus, the final result was  $1.19 \pm 0.09 \times 10^4 \text{ M}^{-1}$ .

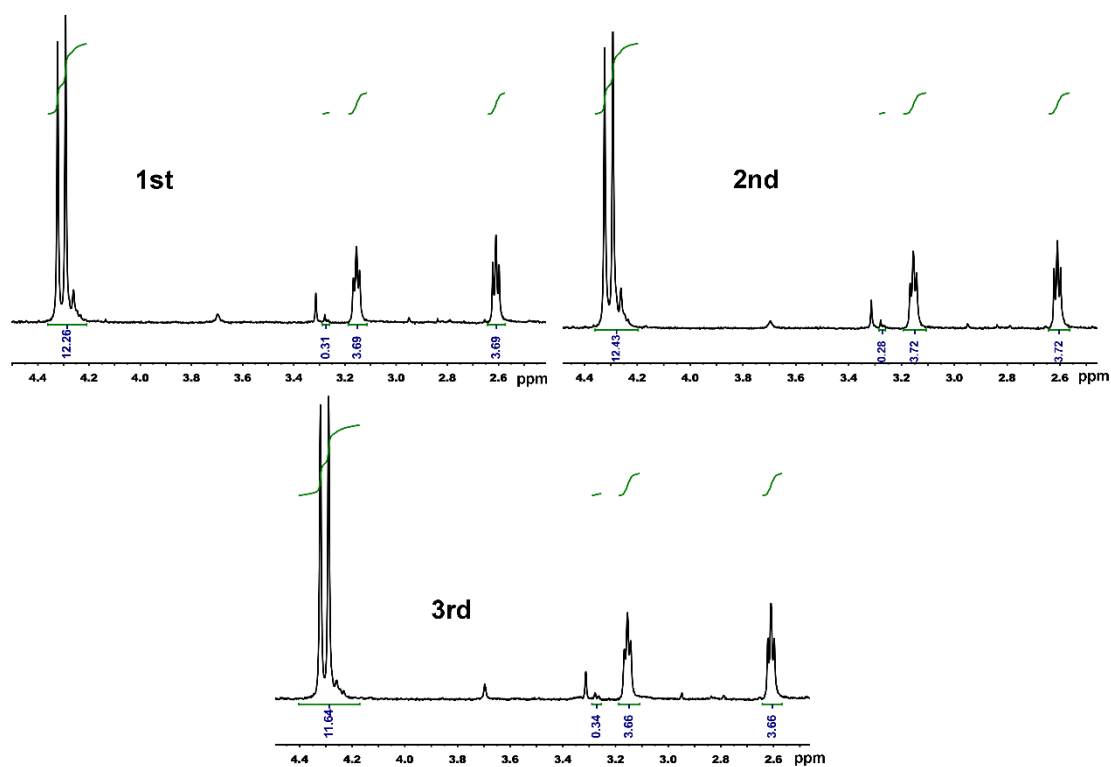

**Figure S15.** Partial <sup>1</sup>H NMR spectra (500 MHz) of mixtures of compound **1** with 1 equiv. CB[6] at pH=7.

## 2.2 Binding constant calculation of compound **2** with CB[6]

Generally, CB[6] and compound **2** was dissolved in D<sub>2</sub>O at the ratio of 1:1. The experiment was performed in triplicate. The binding constants were calculated according to the integral of peaks corresponding to CB[6], compound **2** and pseudorotaxane. The binding constants between CB[6] and compound **2** were calculated to be  $2.46 \times 10^4$ ,  $2.43 \times 10^4$  and  $2.60 \times 10^4$  M<sup>-1</sup>, respectively, giving a final result of  $2.50 \pm 0.10 \times 10^4$  M<sup>-1</sup>.

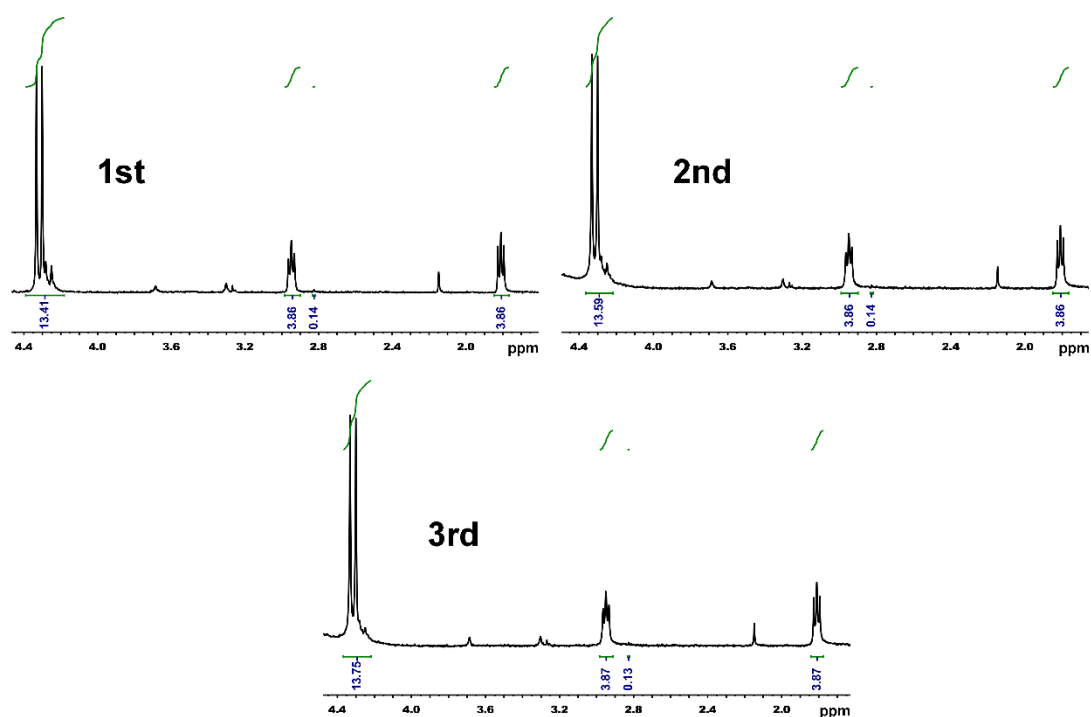

**Figure S16.** Partial <sup>1</sup>H NMR spectra (500 MHz) of mixtures of compound **2** with 1 equiv. CB[6] at pH=7.

### 3. Catalytic curves of compound 1 in enzymatic kinetics tests

#### 3.1 Catalytic curves of compound 1 at the $\text{H}_2\text{O}_2$ concentration fixed to 0.5mmol/L

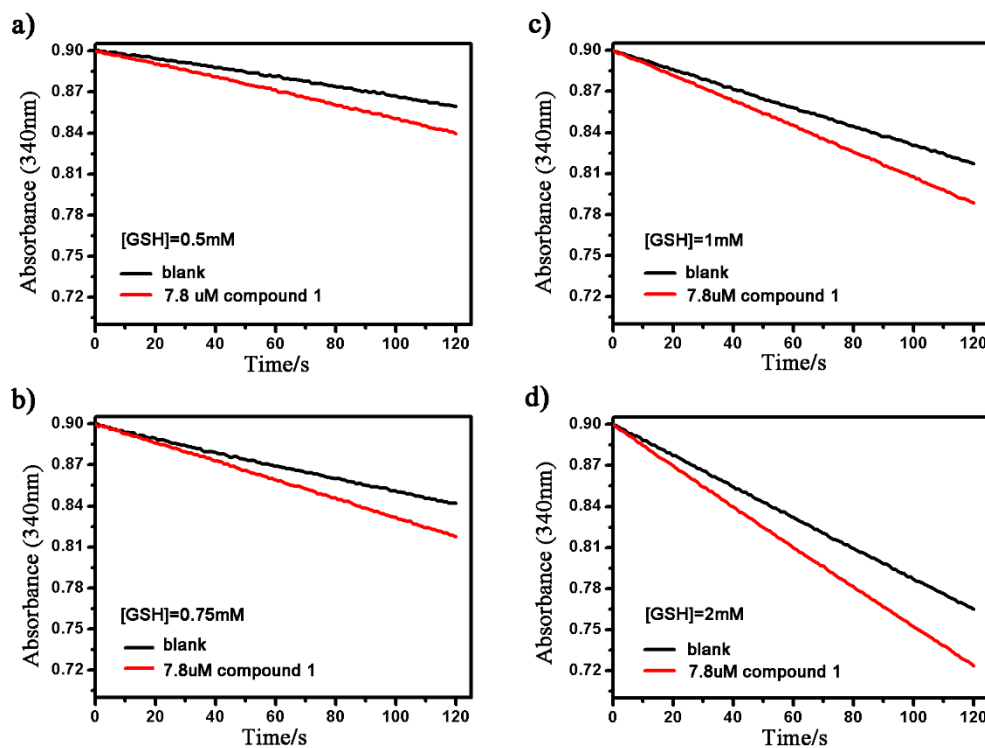

**Figure S17.** Catalytic curves of compound 1 at the  $\text{H}_2\text{O}_2$  concentration fixed to 0.5mmol/L and GSH concentration of a) 0.5mmol/L; b) 1.0mmol/L; c) 1.5mmol/L; d) 1.0mmol/L.

### 3.2 Catalytic curves of compound 1 at the $\text{H}_2\text{O}_2$ concentration fixed to 0.75mmol/L

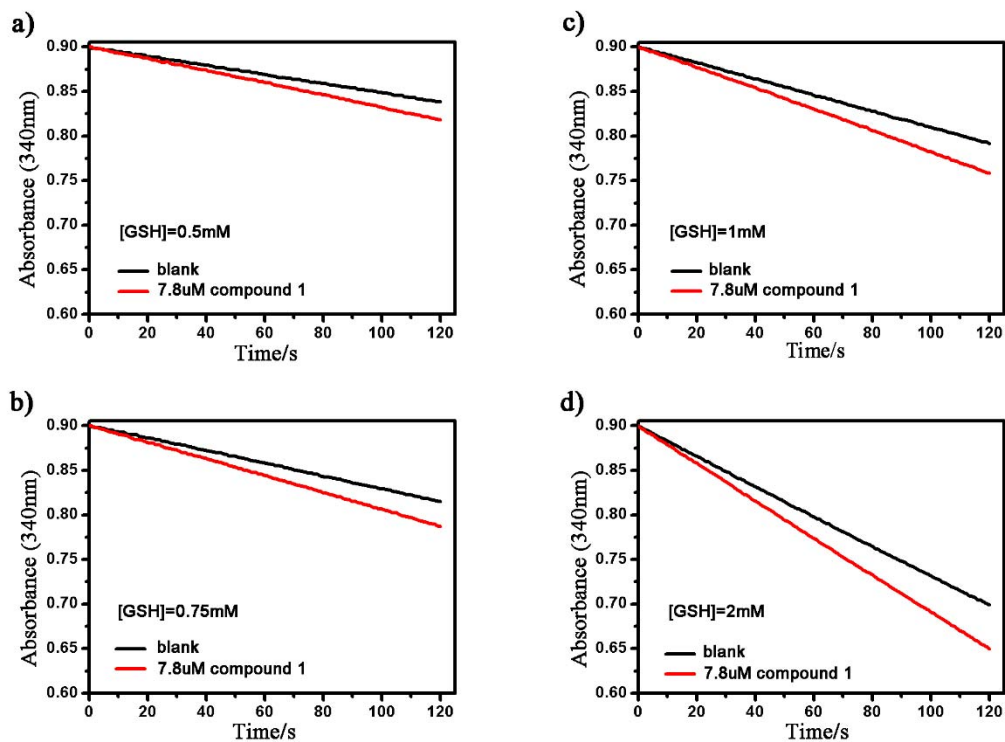

**Figure S18.** Catalytic curves of compound 1 at the  $\text{H}_2\text{O}_2$  concentration fixed to 0.75mmol/L and GSH concentration of a) 0.5mmol/L; b) 1.0mmol/L; c) 1.5mmol/L; d) 1.0mmol/L.

### 3.3 Catalytic curves of compound 1 at the $\text{H}_2\text{O}_2$ concentration fixed to 1.0mmol/L

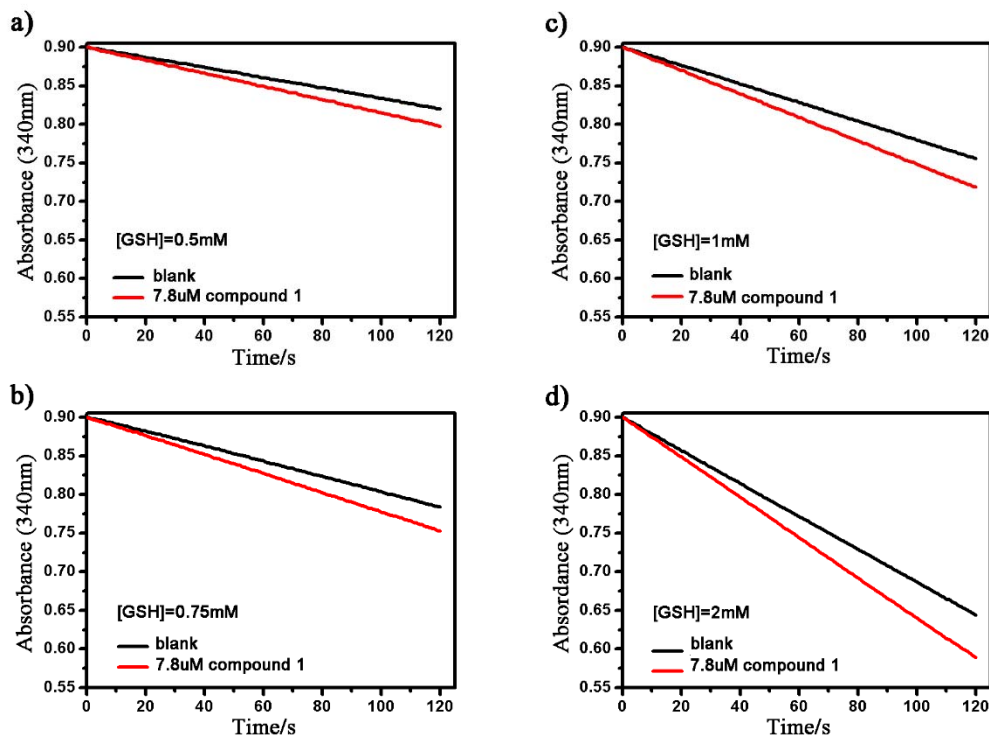

**Figure S19.** Catalytic curves of compound 1 at the  $\text{H}_2\text{O}_2$  concentration fixed to 1.0mmol/L and GSH concentration of a) 0.5mmol/L; b) 1.0mmol/L; c) 1.5mmol/L; d) 1.0mmol/L.

## 4. Catalytic curves of compound 2 in enzymatic kinetics tests

### 4.1 Catalytic curves of compound 2 at the $\text{H}_2\text{O}_2$ concentration fixed to 0.5mmol/L

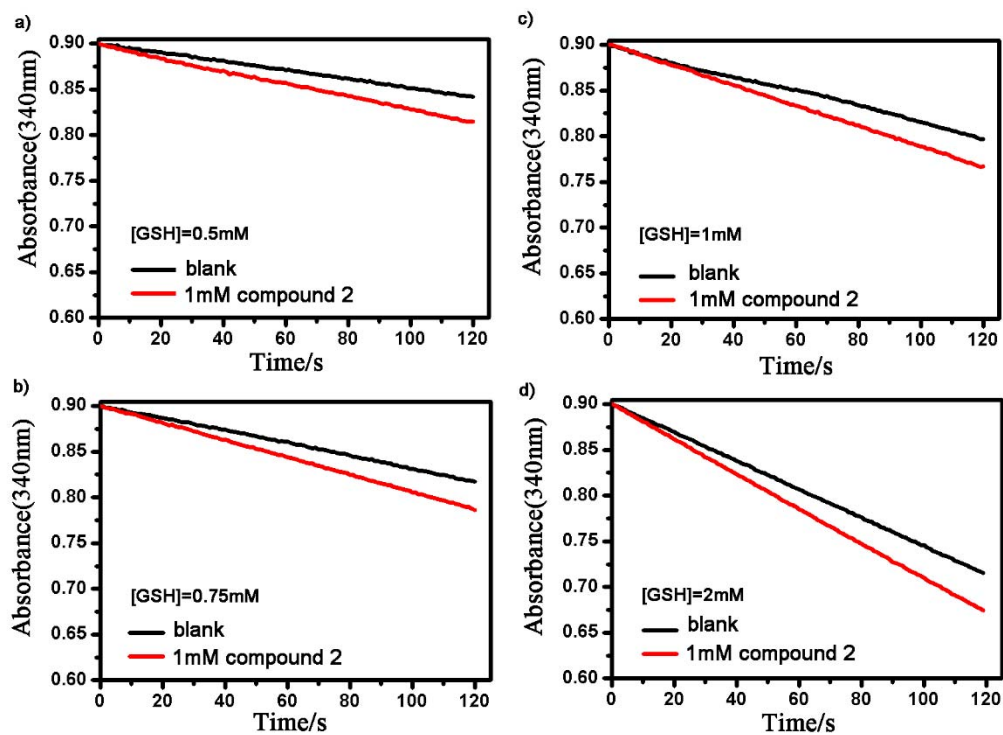

**Figure S20.** Catalytic curves of compound 2 at the  $\text{H}_2\text{O}_2$  concentration fixed to 0.5mmol/L and GSH concentration of a) 0.5mmol/L; b) 1.0mmol/L; c) 1.5mmol/L; d) 1.0mmol/L.

## 4.2 Catalytic curves of compound 2 at the $\text{H}_2\text{O}_2$ concentration fixed to 0.75mmol/L

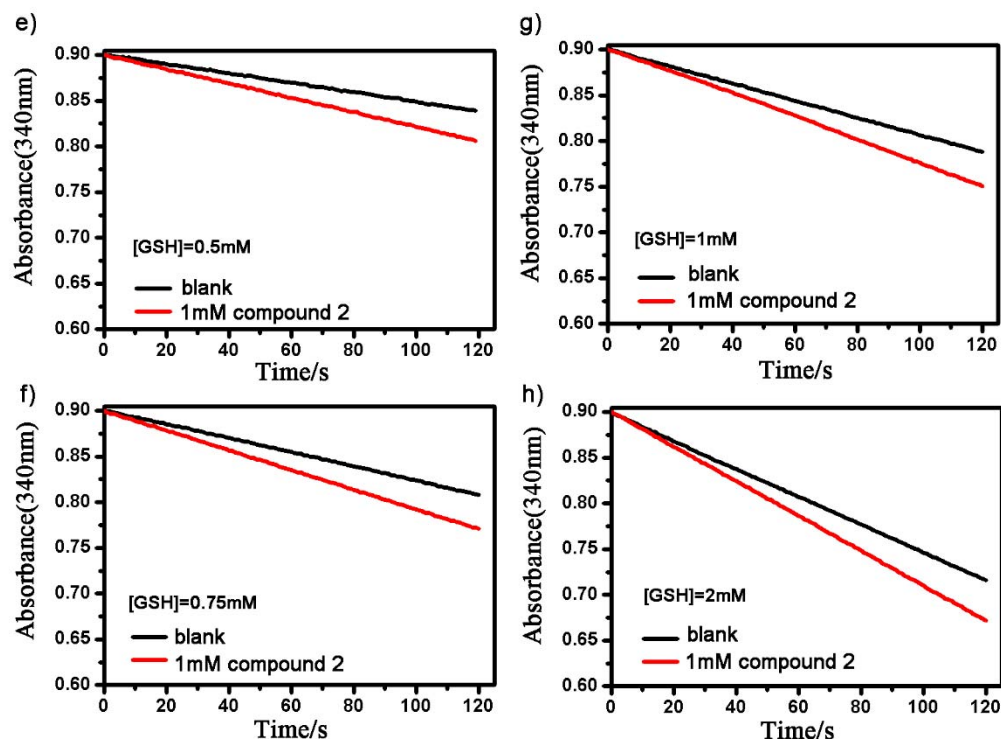

**Figure S21.** Catalytic curves of compound 2 at the  $\text{H}_2\text{O}_2$  concentration fixed to 0.75mmol/L and GSH concentration of a) 0.5mmol/L; b) 1.0mmol/L; c) 1.5mmol/L; d) 1.0mmol/L.

### 4.3 Catalytic curves of compound 1 at the $\text{H}_2\text{O}_2$ concentration fixed to 1.0mmol/L



**Figure S22.** Catalytic curves of compound 2 at the  $\text{H}_2\text{O}_2$  concentration fixed to 1.0mmol/L and GSH concentration of a) 0.5mmol/L; b) 1.0mmol/L; c) 1.5mmol/L; d) 1.0mmol/L.

## 5. Double-reciprocal plots of the reduction of $\text{H}_2\text{O}_2$ by GSH under the catalysis of compound 1

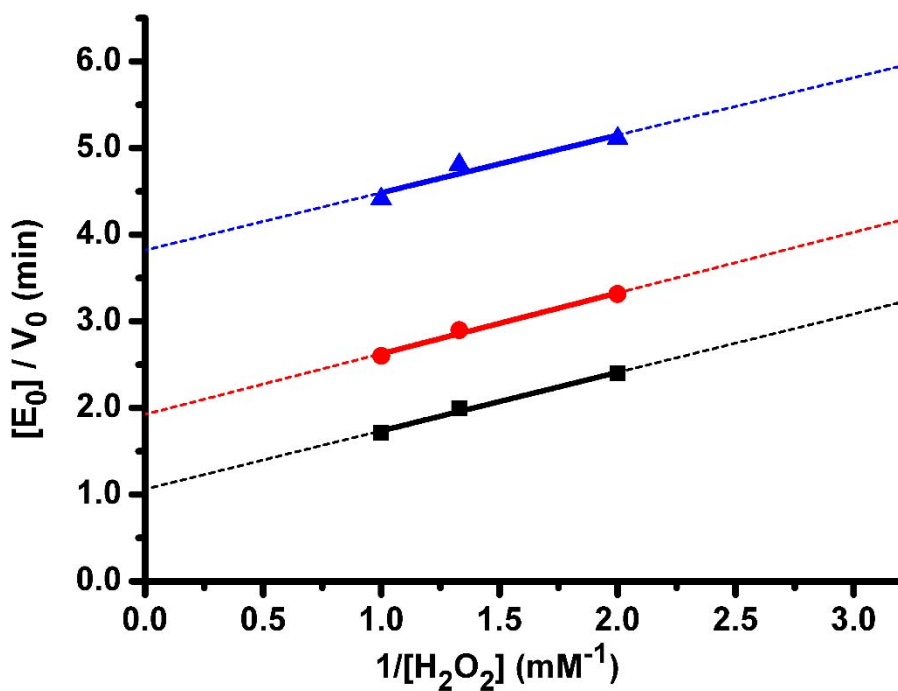

**Figure S23.** Double-reciprocal plots of the reduction of  $\text{H}_2\text{O}_2$  by GSH under the catalysis of compound 1.  $[E_0]$ =total enzyme concentration;  $[E_0] / v_0$  versus  $1 / [\text{H}_2\text{O}_2]$  ( $\text{mM}^{-1}$ ) at  $[\text{GSH}] = 0.5 \text{ mM}$  ( $\blacktriangledown$ ),  $1.0 \text{ mM}$  ( $\bullet$ ) and  $2.0 \text{ mM}$  ( $\blacksquare$ ).

## 6. Double-reciprocal plots of the reduction of $\text{H}_2\text{O}_2$ by GSH under the catalysis of compound 2

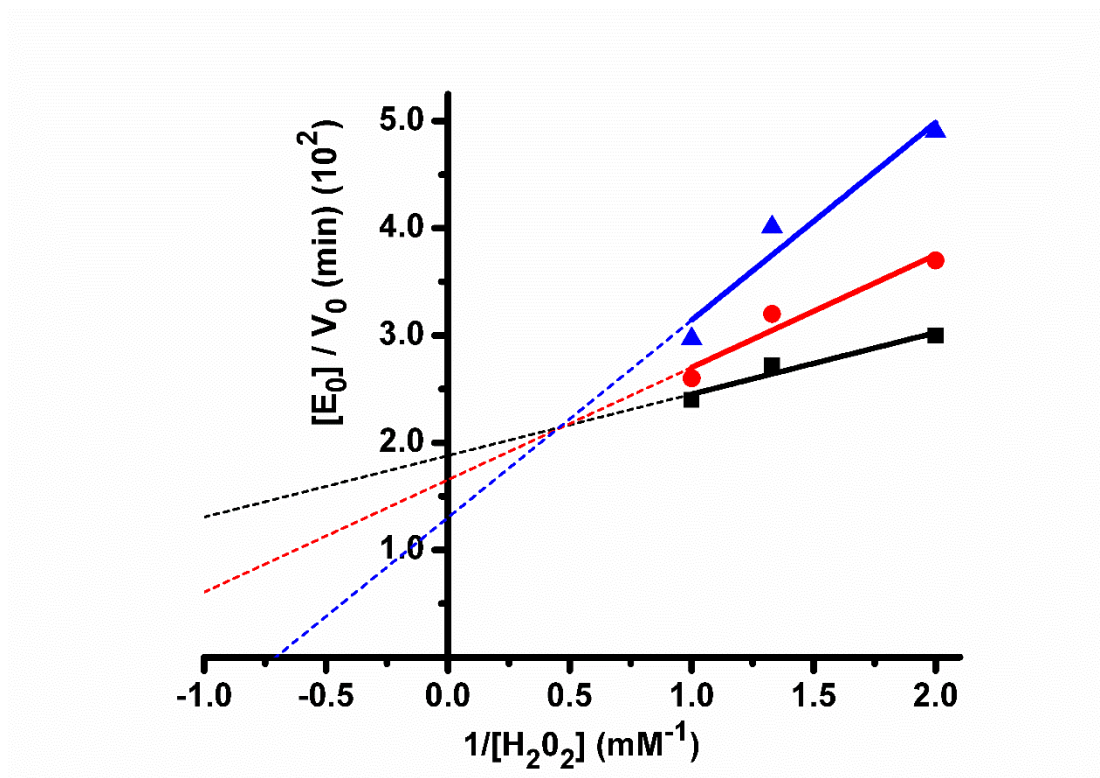

**Figure S24.** Double-reciprocal plots of the reduction of  $\text{H}_2\text{O}_2$  by GSH under the catalysis of compound 2.  $[E_0]$ =total enzyme concentration;  $[E_0] / v_0$  versus  $1 / [\text{H}_2\text{O}_2]$  ( $\text{mM}^{-1}$ ) at  $[\text{GSH}] = 0.5 \text{ mM}$  (▼),  $1.0 \text{ mM}$  (●) and  $2.0 \text{ mM}$  (■).
